# Supplementary material for: Sexuality and Health
Source: Royal Society of Chemistry journal article supplement (doi:10.1039/b802488j), 2012-01-01

# [C<sub>4</sub>mim][NTf<sub>2</sub>] before sorbent exposure

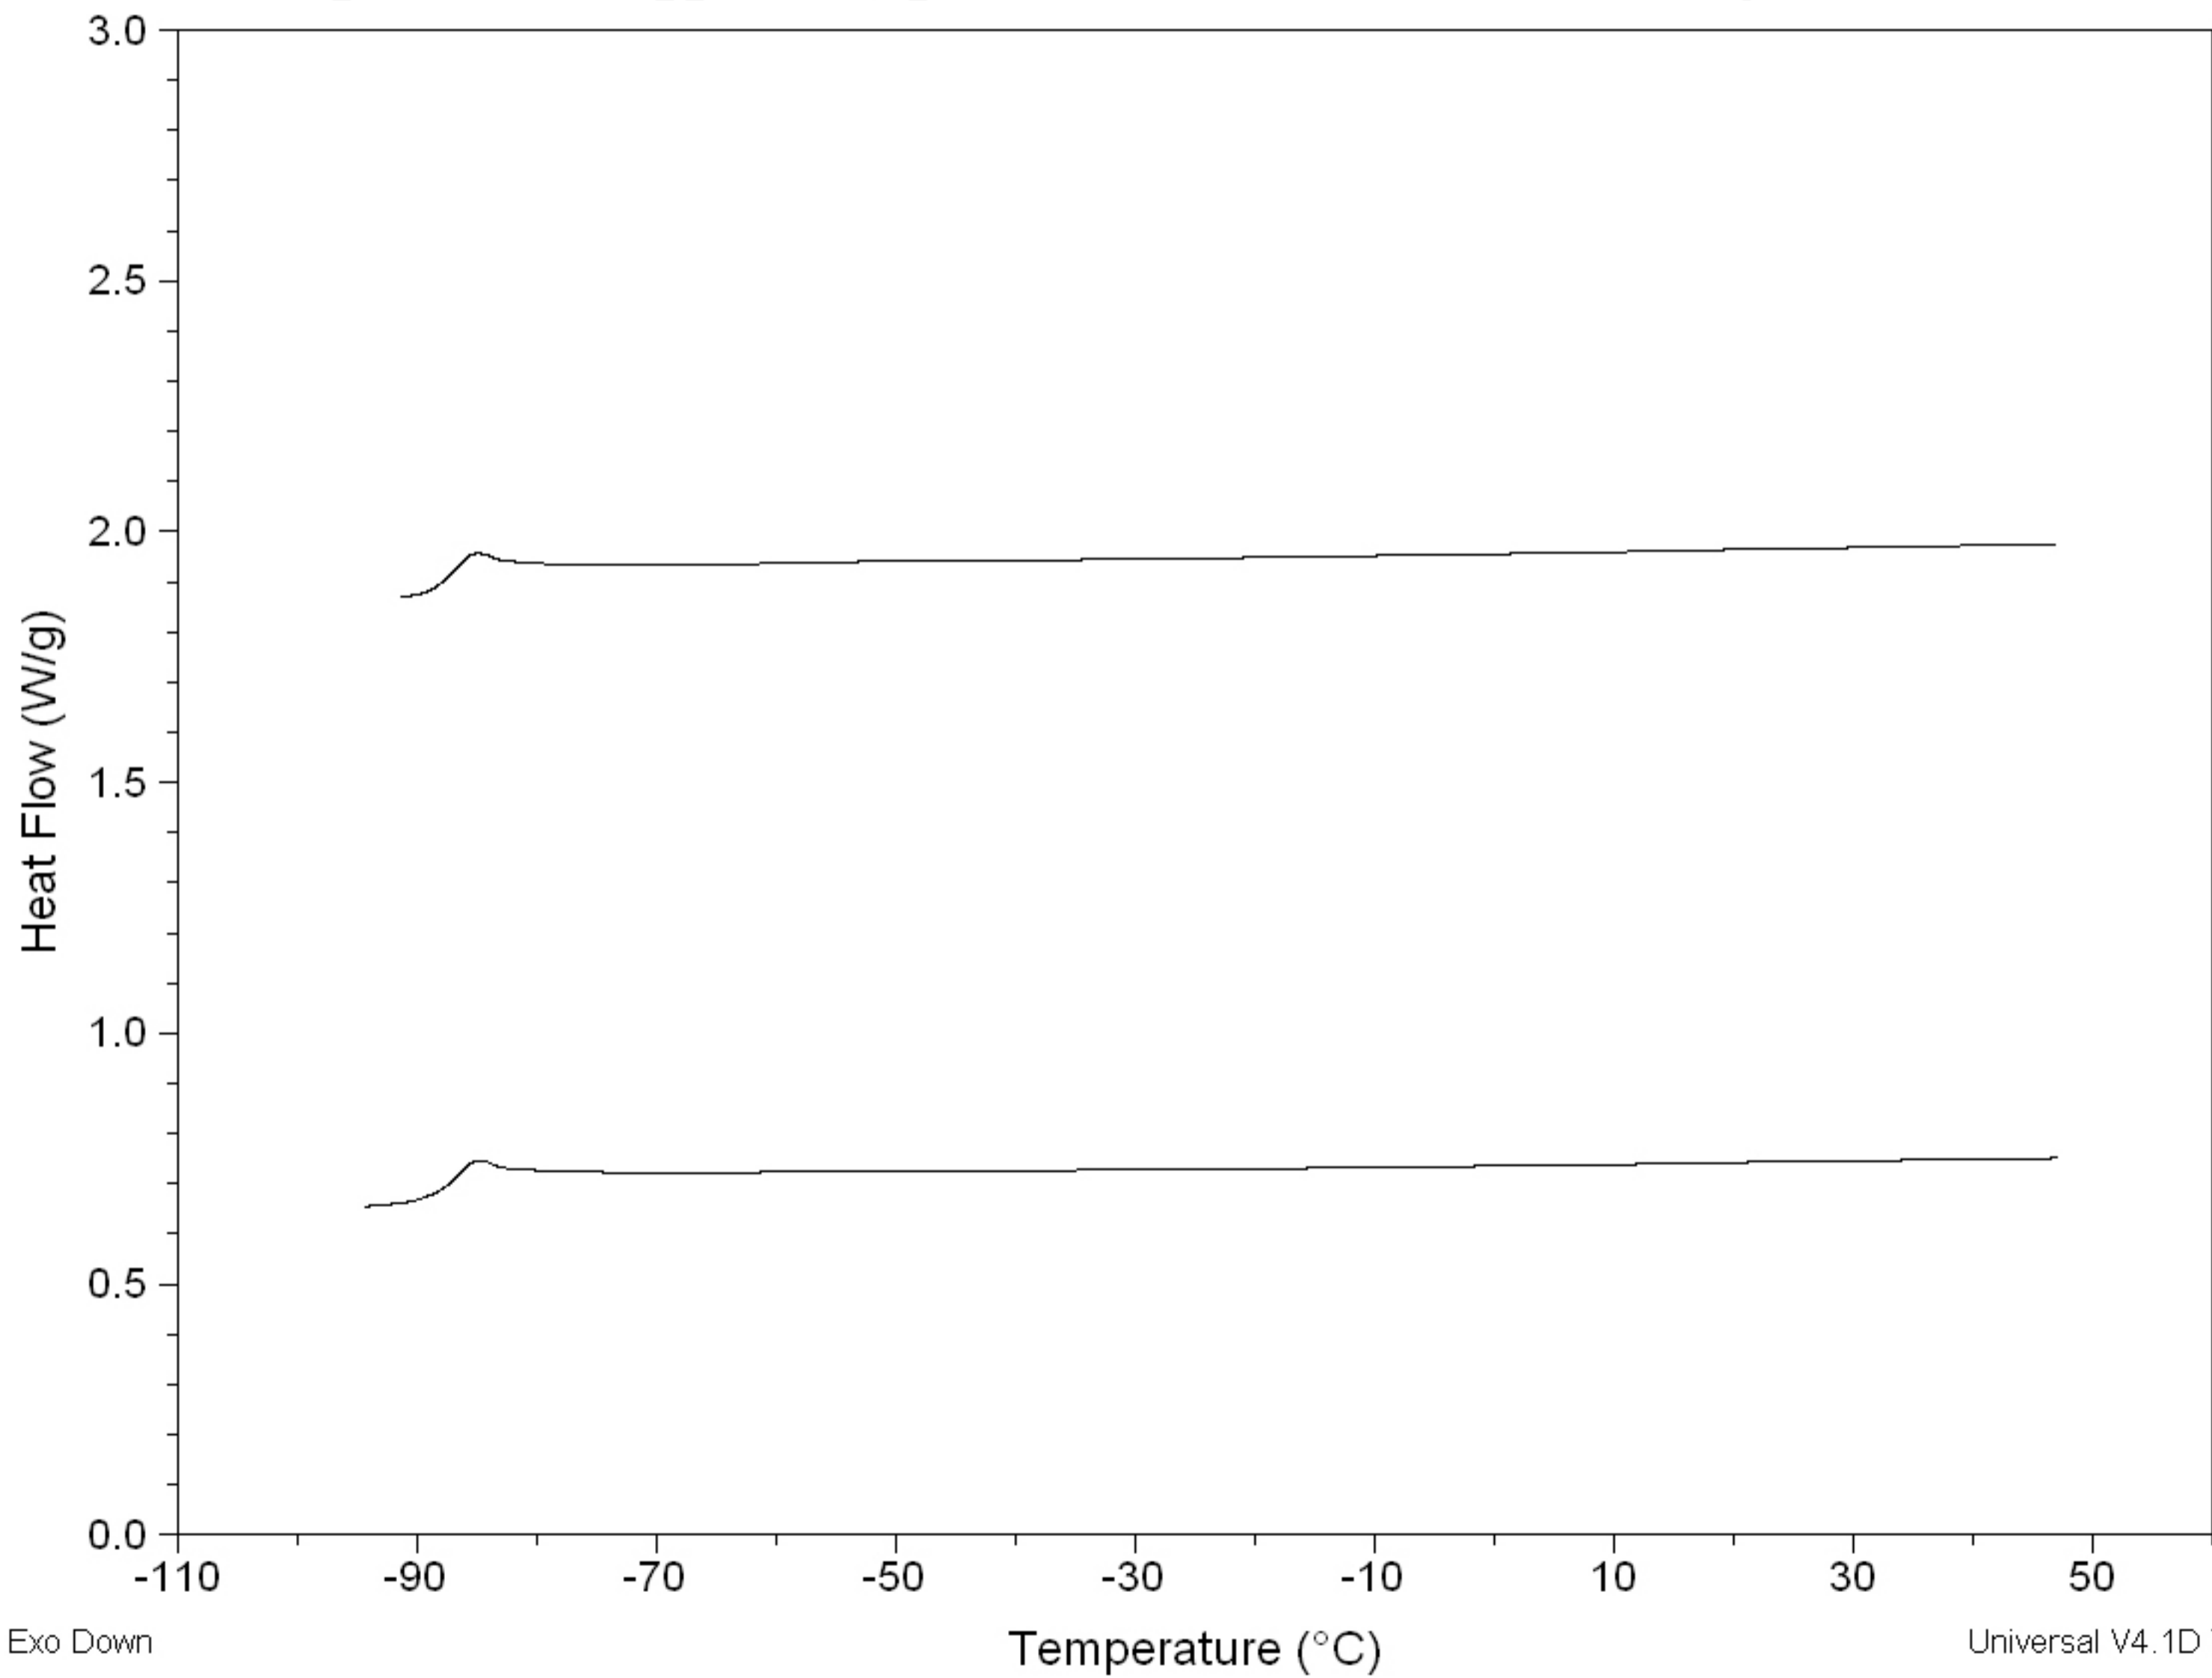

# [C<sub>4</sub>mim][NTf<sub>2</sub>] exposed to Alumina

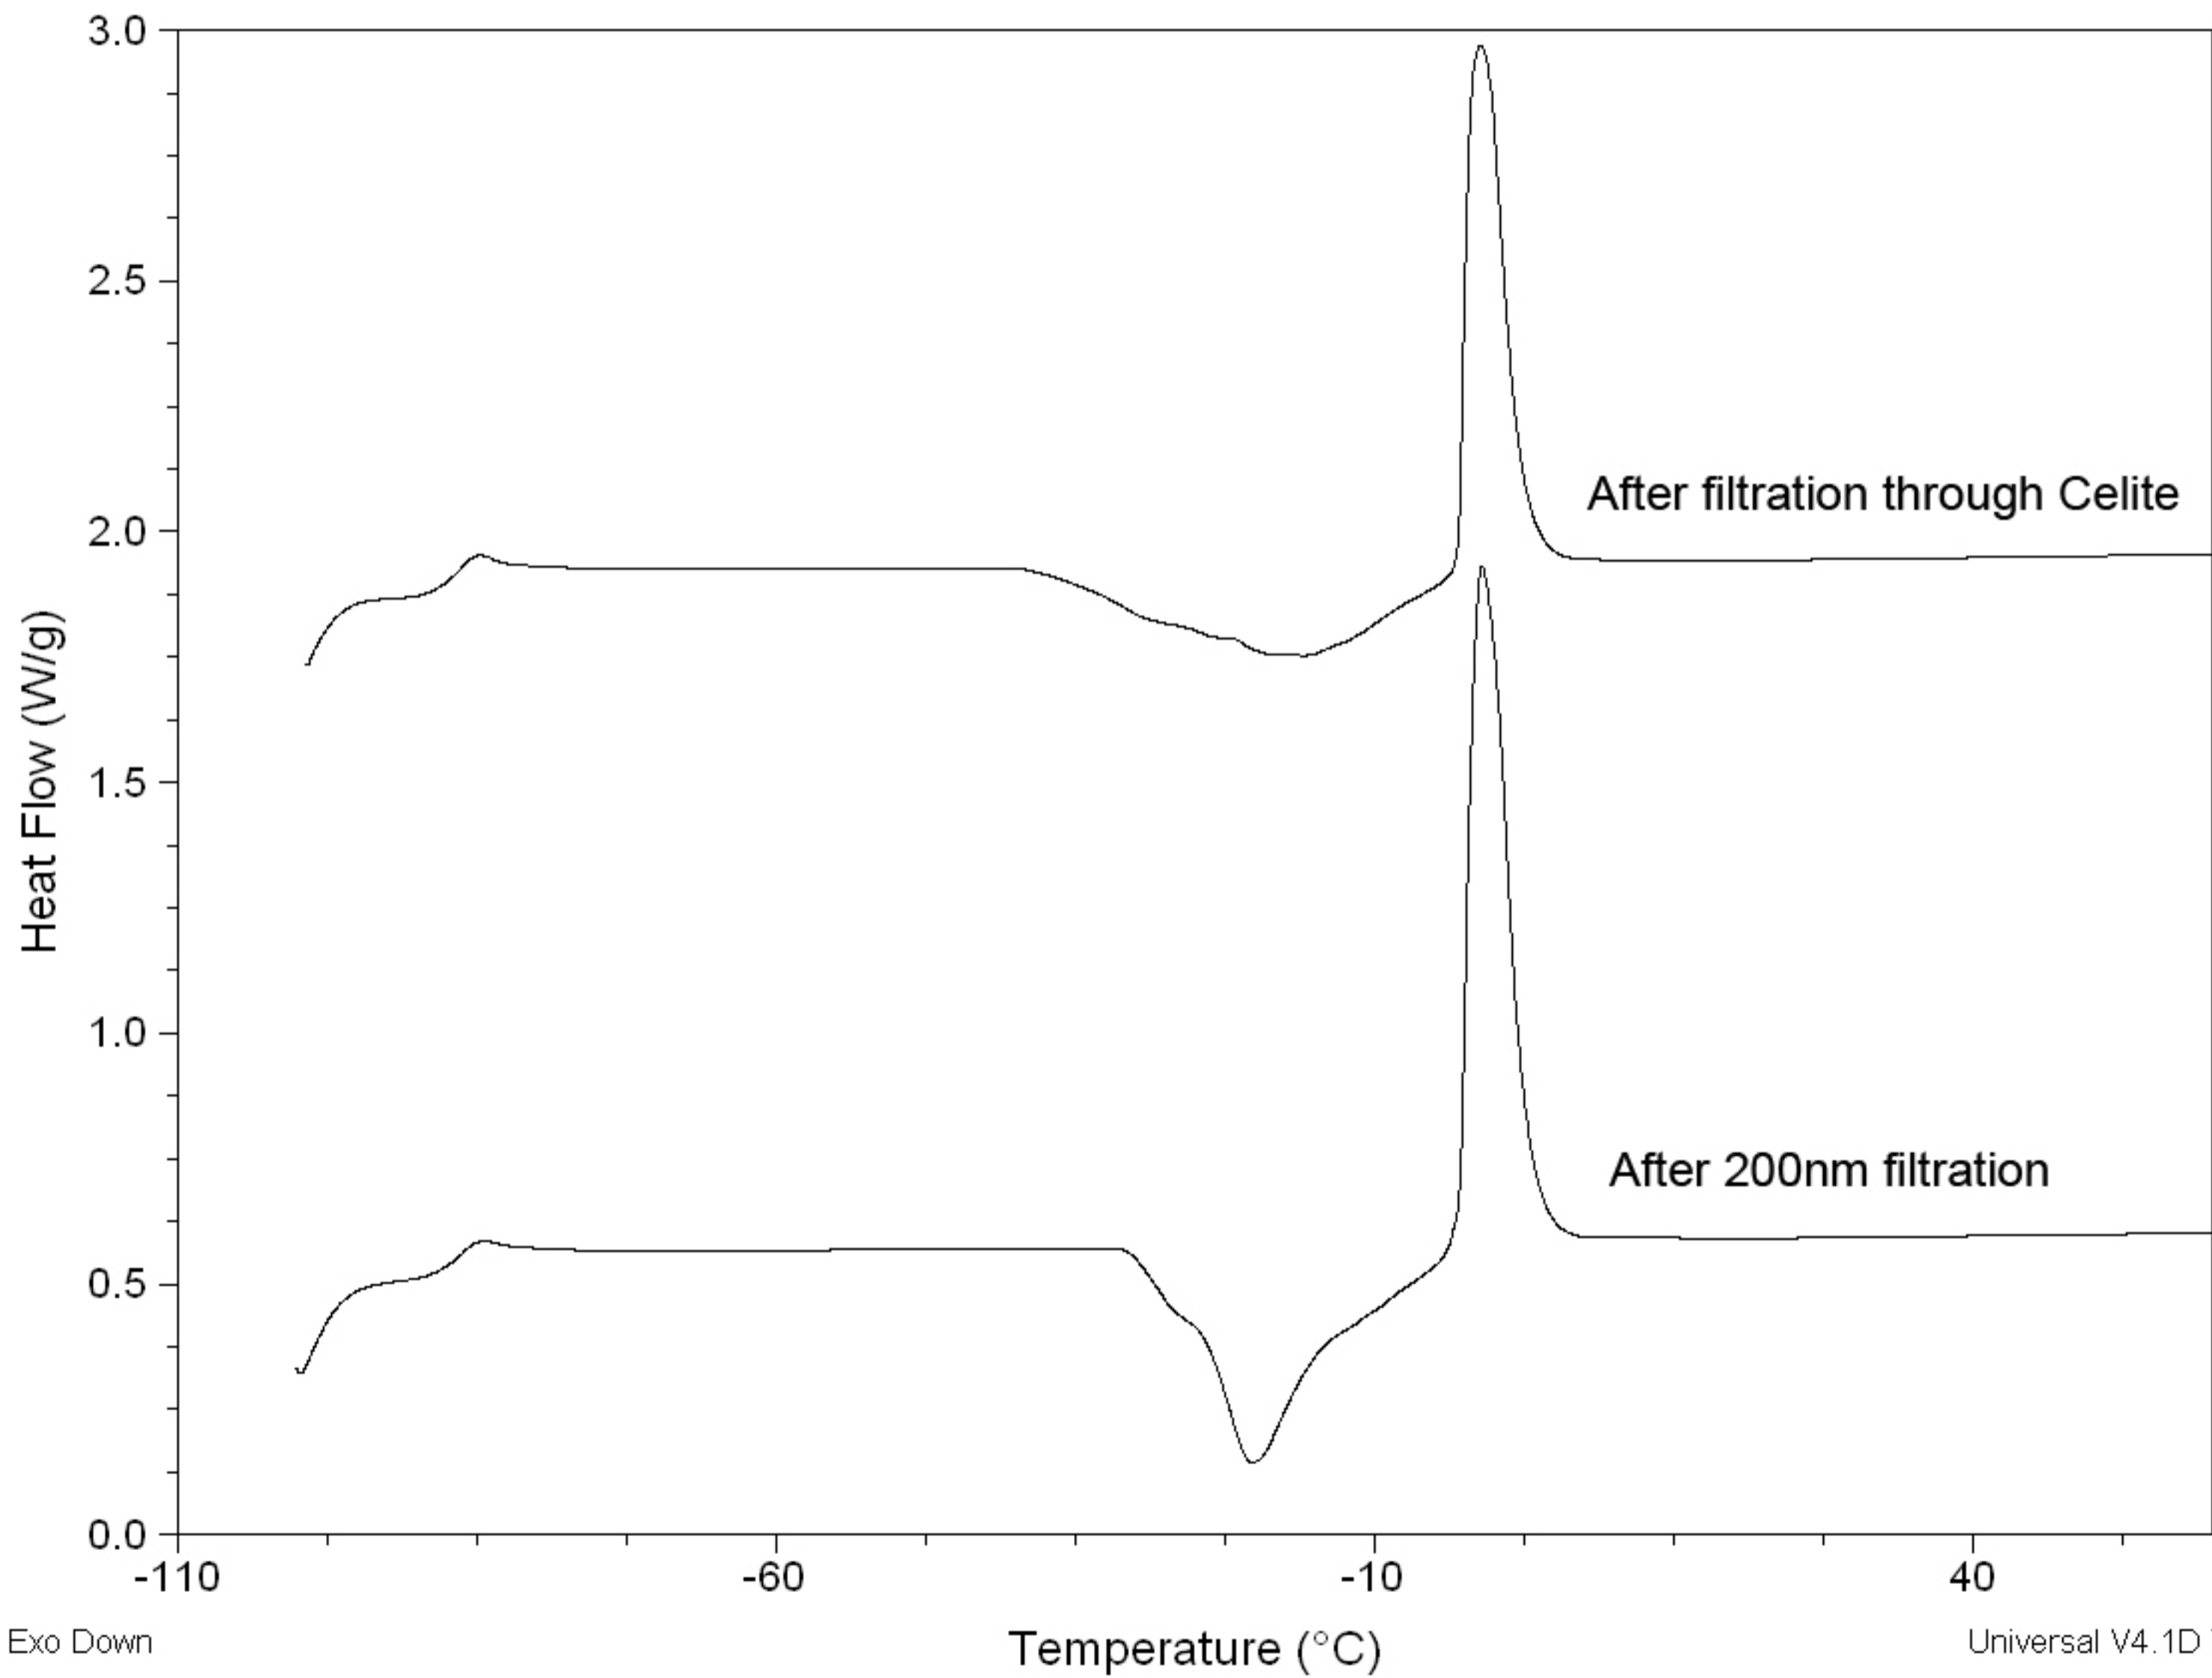

# [C<sub>4</sub>mim][NTf<sub>2</sub>] exposed to Carbon

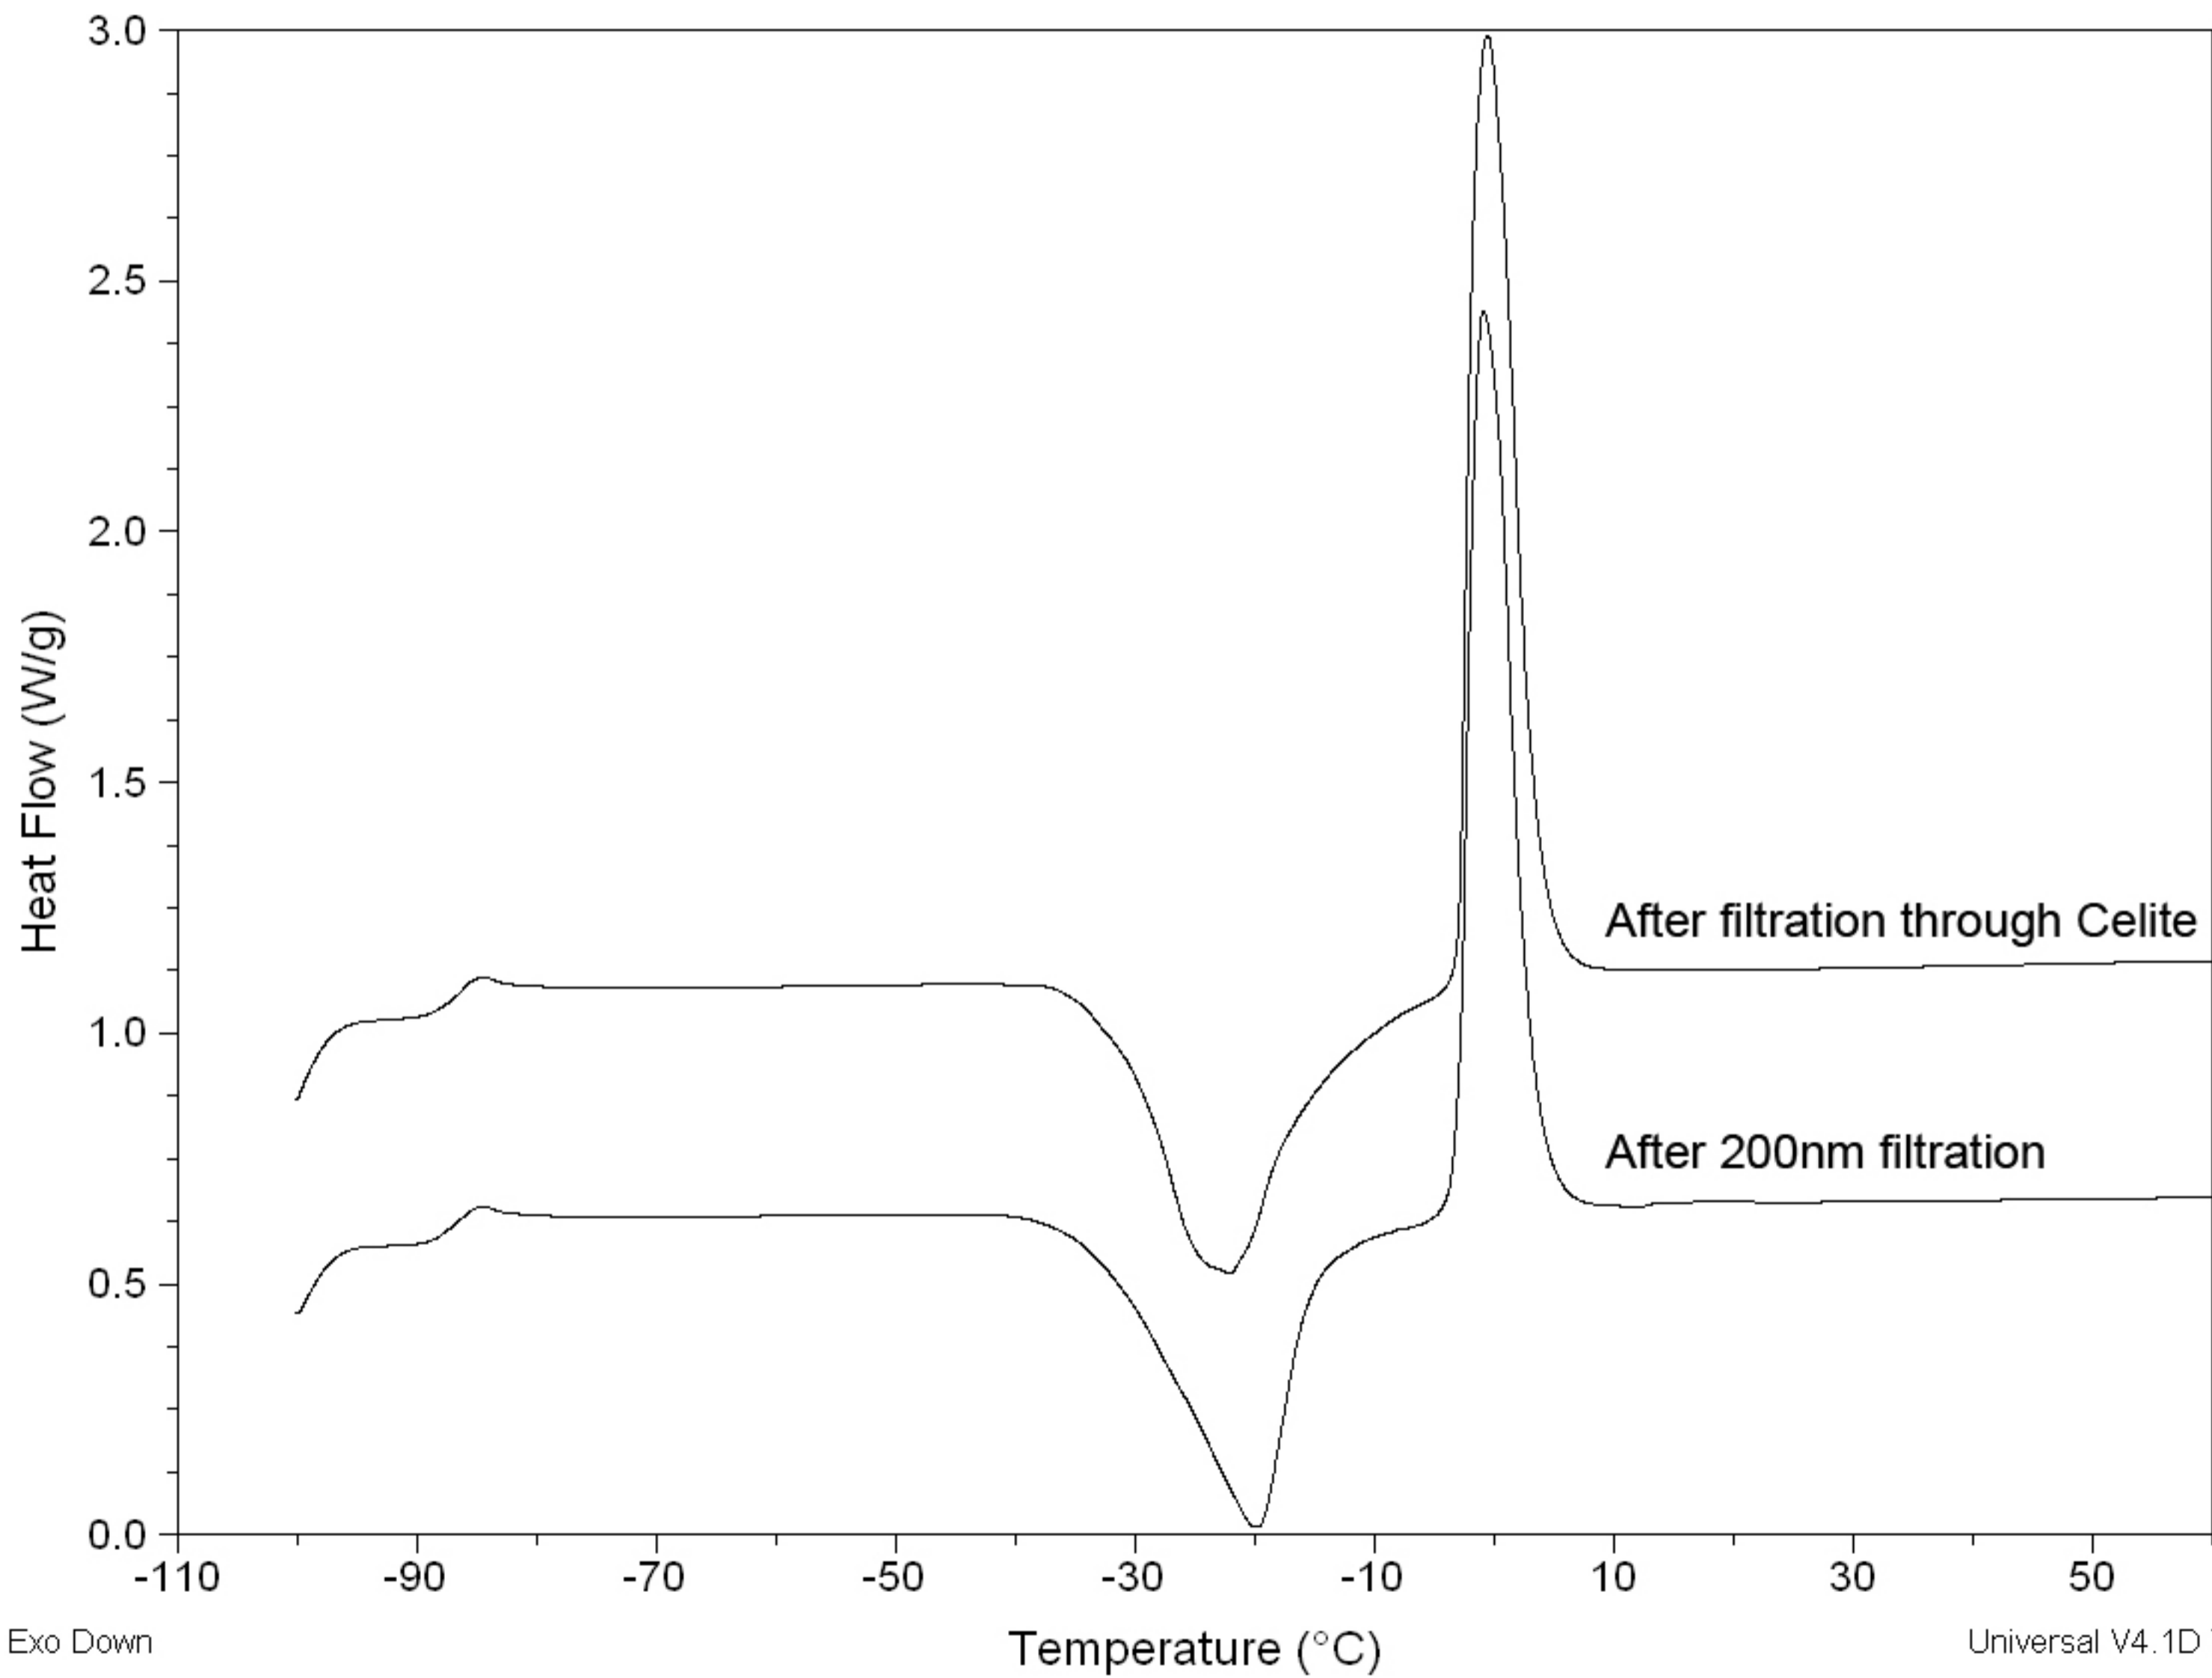

# [C<sub>4</sub>mim][NTf<sub>2</sub>] exposed to Silica

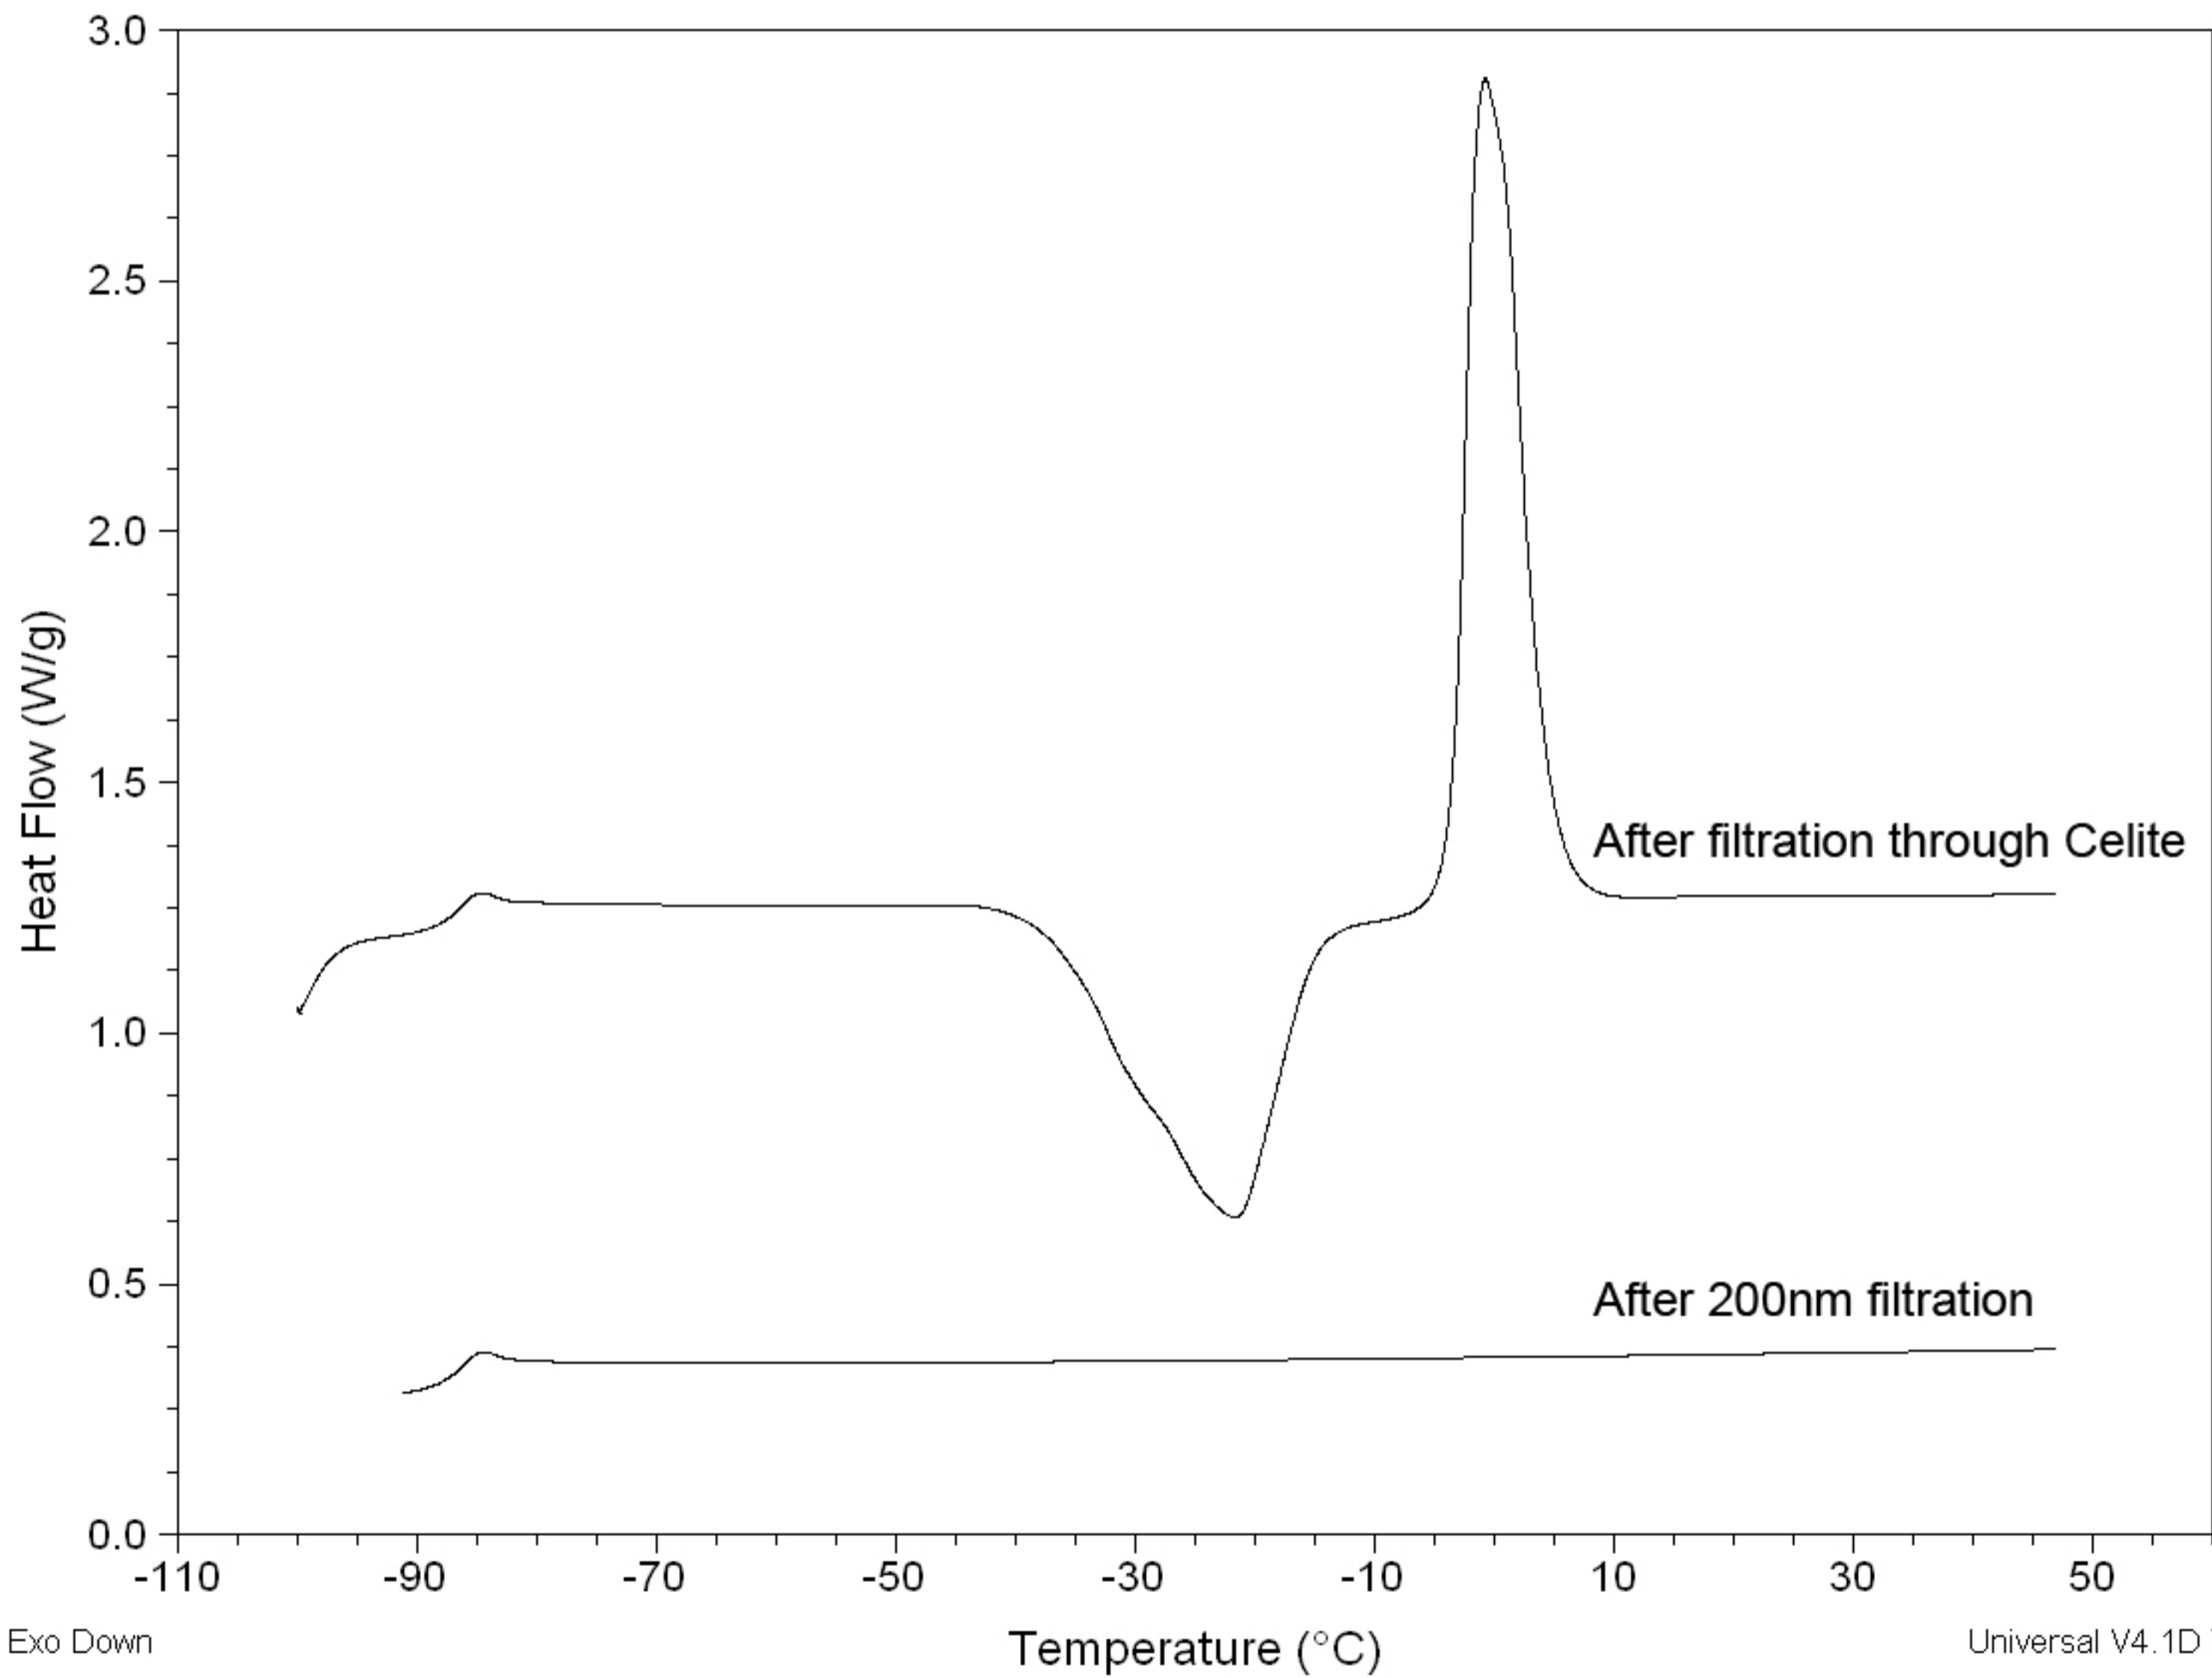

Supplement: b802488j.pdf [file b802488j.pdf]
